# Supplementary material
Source: Research Square preprint supplement (doi:10.21203/rs.3.rs-9603450/v1)
Supplement: Supplementary file 1 [file a8785113c489d5158390a3cc.docx]

**Supplementary Figure Legend**

**Supplementary Figure S1.** ROC curve for 60-day mortality after third-line therapy initiation

The AUC (0.83) represents an apparent (optimistic) estimate derived from the fitted model without internal validation or calibration. Confidence intervals were not calculated. This analysis is exploratory and descriptive and should not be interpreted as a clinically deployable prediction model. The purpose of this figure is to illustrate that baseline characteristics, particularly ECOG PS ≥ 2, may identify patients at high risk of early mortality after third-line initiation, highlighting the importance of careful patient selection rather than providing a validated prediction model.

Abbreviations: ROC, receiver operating characteristic; AUC, area under the curve.

**Supplementary Figure Table**

**Supplementary Table S1.** Missing data for covariates included in adjusted models

| **Variable** | **30-day landmark cohort (n = 48)** | **45-day overlap cohort (n = 78)** |
| --- | --- | --- |
| Age, years | 0 (0.0%) | 0 (0.0%) |
| Sex | 0 (0.0%) | 0 (0.0%) |
| ECOG PS at index | 0 (0.0%) | 0 (0.0%) |
| Albumin at index, g/dL | 1 (2.1%) | 1 (1.3%) |
| CRP at index, mg/dL | 1 (2.1%) | 1 (1.3%) |
| Total bilirubin at index, mg/dL | 1 (2.1%) | 1 (1.3%) |
| Second-line PFS, days | 0 (0.0%) | 0 (0.0%) |
| Peritoneal dissemination at baseline | 0 (0.0%) | 0 (0.0%) |
| Liver metastasis at baseline | 0 (0.0%) | 0 (0.0%) |

Missingness was assessed in the analytic cohorts prior to complete-case analysis (eligible n = 48 and n = 78), resulting in final sample sizes of n = 47 and n = 77, respectively.

Abbreviations: AUC, area under the curve; CRP, C-reactive protein; ECOG, Eastern Cooperative Oncology Group; PFS, progression-free survival; PS, performance status; ROC, receiver operating characteristic.
